# Supplementary material
Source: Springer Nature journal article supplement (https://www.springermedizin.de/resource/supplementary/12879_2011_1746_MOESM1_ESM.pdf/9443326)

**1A**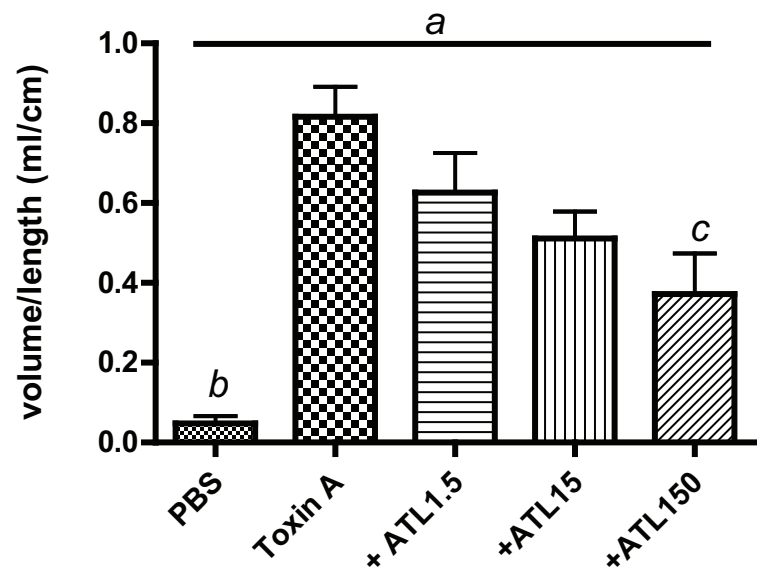**1B**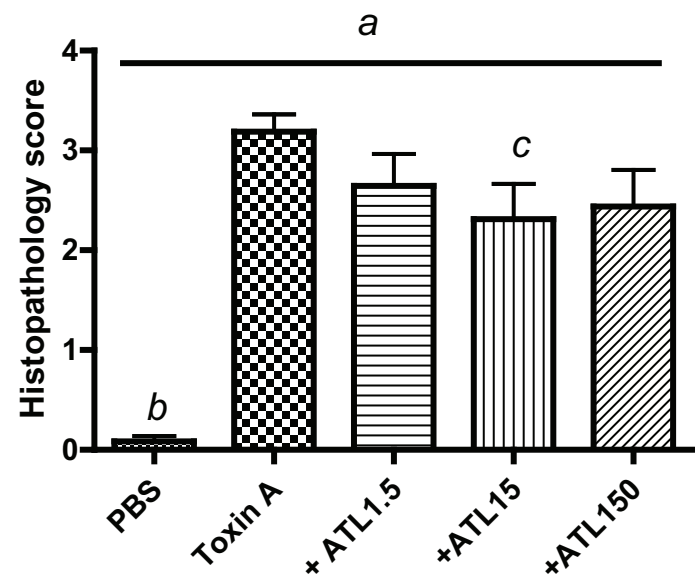

Supplement: MOESM1 [file 9443326]
